# Supplementary material for: Non-Conveyance Due to Patient-Initiated Refusal in Emergency Medical Services: A Retrospective Population-Based Registry Analysis Study in Riyadh Province, Saudi Arabia
Source: MDPI journal article supplement (doi:10.3390/ijerph18179252), 2021-09-02
Supplement: s1 [file s1]

Supplementary Table 1 presents the detailed information of the distribution of EMS records for NC due to PIR (n= 23991) stratified by different categories of characteristic variables related to patients and missions. Therefore, of total EMS missions ended by NC due to PIR (n=23991), 64% were males, while females were 36%. Children accounted for 4.4%, adults 67.5%, and elderly 28.1%. Urbancitiy of patients' locations showed that 89.4% of all NC due to PIR were from Riyadh's capital city, 7.8% from small cities, and 2.8% from rural areas. In addition, 54.1% of all NC due to PIR accounted for daytime shifts, whereas 45.9% were during nighttime shifts. 72.4% of all NC due to PIR were dispatched by BLS crews, while 44.5% were dispatched as high urgent of priority.

**Table S1. Distribution of non-conveyance due to patient-intiated refusal (n= 23,991)**

| Characteristics          | Number | Percentages |
|--------------------------|--------|-------------|
| <b>Sex</b>               |        |             |
| Male                     | 15346  | 64.0 %      |
| Female                   | 8645   | 36.0 %      |
| <b>Age category</b>      |        |             |
| Child < 15 y             | 1048   | 4.4 %       |
| Adult ≥ 15 - < 60 y      | 16205  | 67.5 %      |
| Elderly ≥ 60 y           | 6738   | 28.1 %      |
| <b>Patients location</b> |        |             |
| Riyadh city 5            | 21437  | 89.4 %      |
| Small cities             | 1873   | 7.8 %       |
| Rural ≤ 5000             | 681    | 2.8 %       |
| <b>EMS Shift</b>         |        |             |
| Daytime                  | 12982  | 54.1 %      |
| Nighttime                | 11009  | 45.9 %      |
| <b>Week</b>              |        |             |
| Weekday                  | 17264  | 72.0 %      |
| Weekend                  | 6727   | 28.0 %      |
| <b>Works period</b>      |        |             |
| Rest time                | 18008  | 75.1 %      |
| Office time              | 5983   | 24.9 %      |
| <b>Emergency types</b>   |        |             |
| Non-emergencies          | 9227   | 38.5 %      |
| Medical                  | 10111  | 42.1 %      |
| Trauma                   | 4324   | 18.0 %      |
| Psychiatric              | 236    | 1.0 %       |
| Gynecological            | 93     | 0.4 %       |
| <b>Crews type</b>        |        |             |
| Basic life support       | 17365  | 72.4 %      |
| Advanced life suuport    | 6626   | 27.6 %      |
| <b>Urgency levels</b>    |        |             |
| High- priority           | 10680  | 44.5 %      |
| Intermediate             | 4074   | 17.0 %      |
| Low-priority             | 9237   | 38.5 %      |
